# Supplementary material for: A new (TTF)11I8organic molecular conductor: from single crystals to flexible all-organic piezoresistive films
Source: Royal Society of Chemistry journal article supplement (doi:10.1039/c3tc31513d), 2013-10-22
Supplement: c3tc31513d.pdf [file c3tc31513d.pdf]

## SUPPORTING INFORMATION FOR

### A NEW $(\text{TTF})_{11}\text{I}_8$ ORGANIC MOLECULAR CONDUCTOR: FROM SINGLE CRYSTALS TO FLEXIBLE ALL-ORGANIC PIEZORESISTIVE FILMS

Victor Lebedev, Elena Laukhina,\* Evelyn Moreno-Calvo, Concepció Rovira, Vladimir Laukhin, Ivan Ivanov, Sergei M. Dolotov, Valeryi F. Traven,\* Vladimir V. Chernyshev, and Jaume Veciana\*

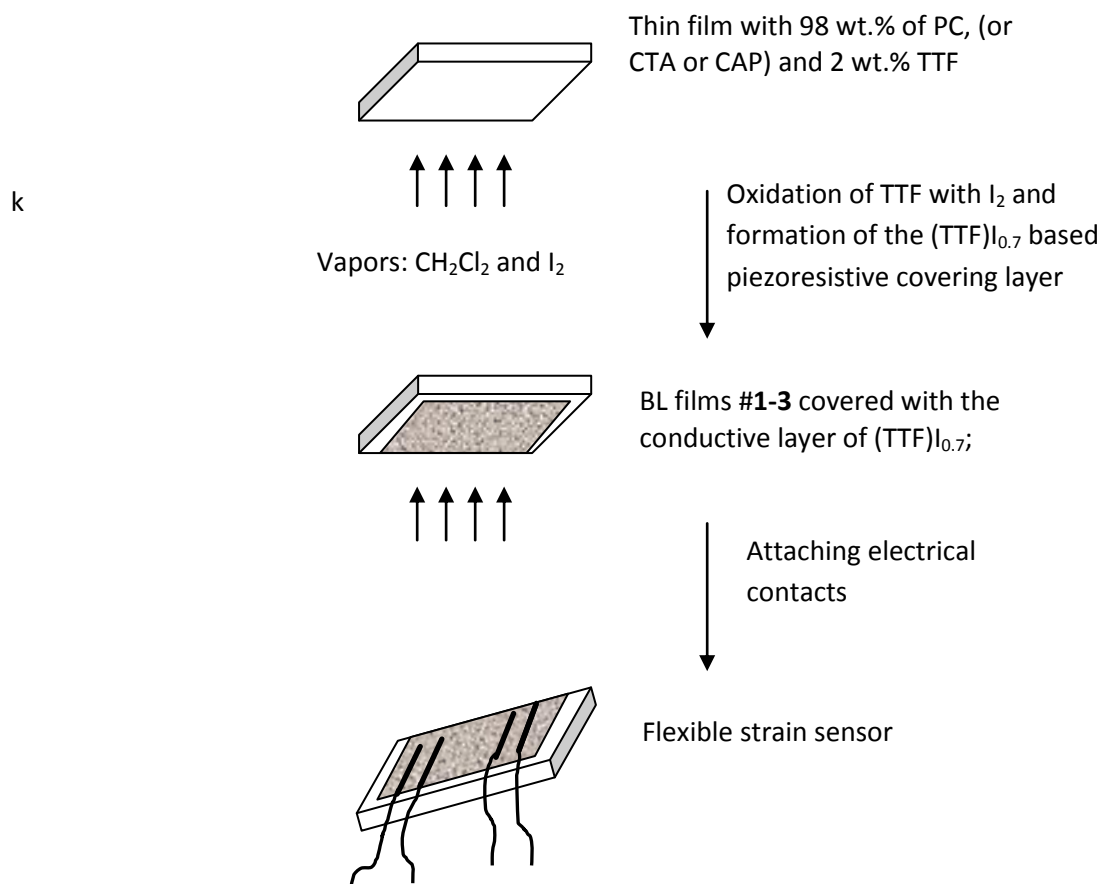

**Figure S1.** Scheme of the preparation method of bilayer (BL) thin films #1-3. PC=polycarbonate, CTA=cellulose triacetate, and CAP=cellulose acetate propionate.

An additional BL film (film #4), which contained copolymer of polycarbonate and siloxane as a polymeric support, was additionally prepared using this method. This BL film was only characterized by X-ray diffraction data (Fig S2b).

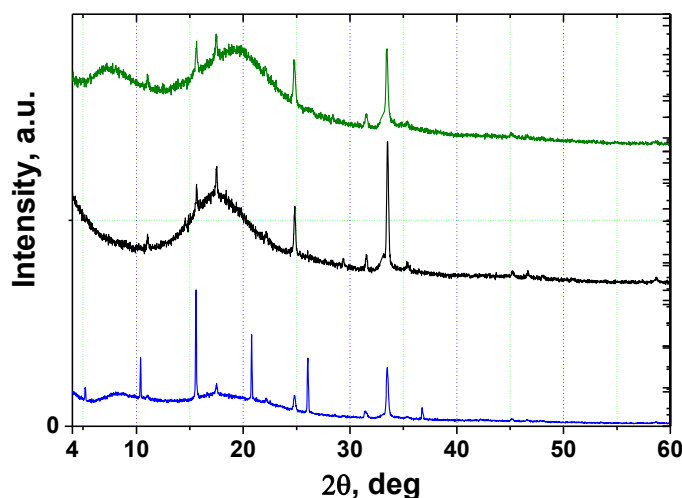

**Figure S2a.** X ray diffraction patterns of BL film #1 (black line), BL film #2 (blue line), and BL film #3 (green line). The film samples with dimensions  $2 \times 3 \text{ cm}^2$  were attached to a glass support and X-ray diffraction data were recorded on a Rigaku “Rotaflex” RU-200B diffractometer in reflection mode with monochromatic  $\text{CuK}\alpha$  radiation ( $\lambda = 1.540598 \text{ \AA}$ ). The generator was activated at 50 kV and 80 mA

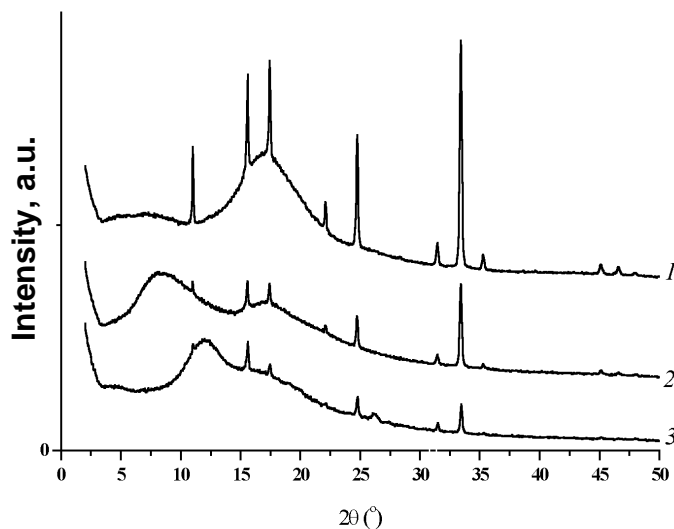

**Figure S2b.** X-ray patterns of BL thin films with conductive layer crystal of  $(\text{TTF})\text{I}_{0.71+d}$  crystals on different polymeric substrates: polycarbonate (1) (replica of BL film #1), cellulose triacetate (2) (replica of BL film #2) and copolymer of polycarbonate and siloxane (3) (BL film #4). Data were collected in reflection mode using a Panalytical EMPYREAN instrument with a linear X<sup>2</sup>celerator detector using non-monochromated  $\text{CuK}\alpha$  radiation

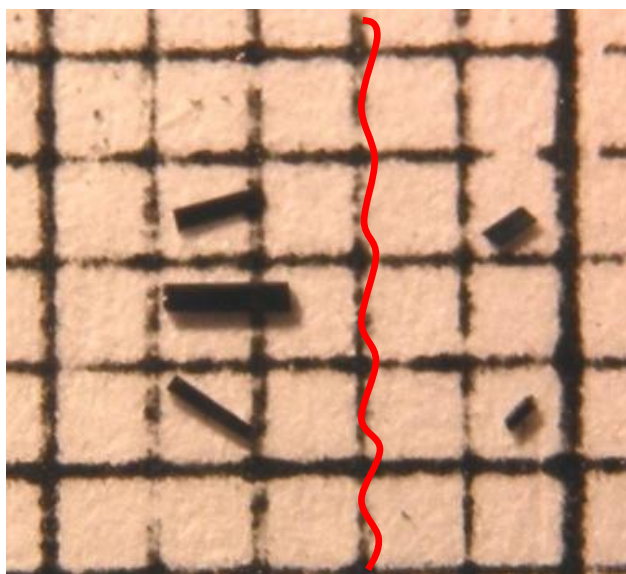

**Figure S3.** Photograph of  $\text{TTF}_{11}\text{I}_8$  (left) and  $(\text{TTF})\text{I}_3$  (right) crystals obtained using oxidation of TTF with iodine (see experimental part of the article). Dimension of cells:  $1 \times 1 \text{ mm}^2$

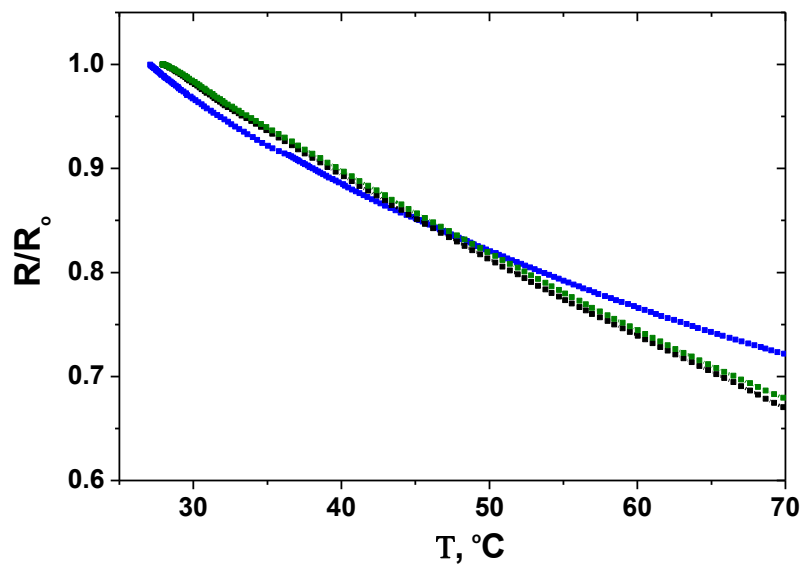

**Figure S4.** Temperature dependences of normalized electrical resistance of the BL film #1 (black line), film #2 (blue line), and film #3 (green line).

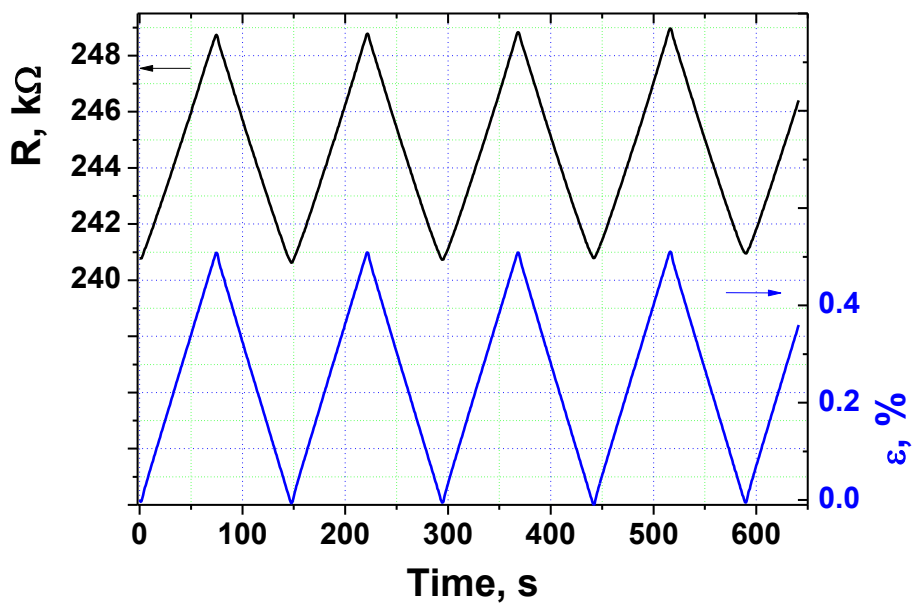

**Figure S5.** Electrical resistance response of the BL film #2 (CTA polymeric matrix) to perform cyclic elastic elongations using a maximum strain of  $\epsilon_{\text{max}} = 0.5\%$ .

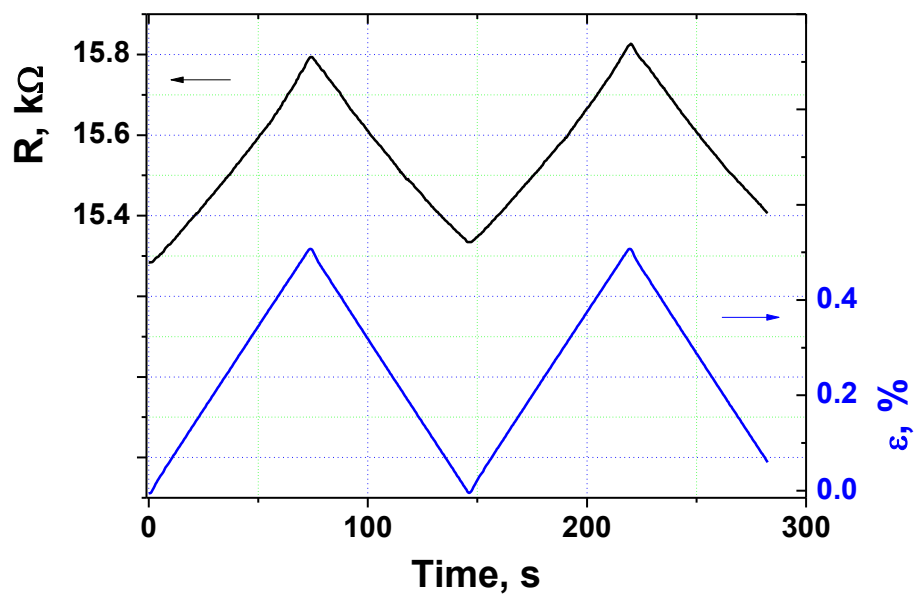

**Figure S6.** Electrical resistance response of BL film #3 (CAP polymeric matrix) to perform cyclic elastic elongation using a maximum of  $\epsilon_{\max} = 0.5\%$ .

**Table S1.** Distances between iodine species extracted from the resolved crystal structure of TTF<sub>11</sub>I<sub>8</sub>, as well as the values of the bond length in I-I and (I-I-I)<sup>-</sup> added for comparison.

| Number of I <sup>-</sup>         | Object1 | Object2 | Length, Å                    |
|----------------------------------|---------|---------|------------------------------|
| 1                                | I8      | I3      | 4.883(5)                     |
| 2                                | I4      | I3      | 4.900(6)                     |
| 3                                | I7      | I4      | 4.892(6)                     |
| 4                                | I1      | I5      | 4.928(5)                     |
| 5                                | I5      | I6      | 4.864(6)                     |
| 6                                | I6      | I2      | 4.875(6)                     |
| <b>I-I</b>                       |         |         | <b>2.68-2.72<sup>1</sup></b> |
| <b>I<sub>3</sub><sup>-</sup></b> |         |         | <b>2,79-3,11<sup>2</sup></b> |

**Table S2.** The central  $C^1=C^4$  and  $C^4-S^4$  bond length extracted from the resolved crystal structure of  $TTF_{11}I_8$ , the charge transfer of each molecule of TTF in asymmetric unit was calculated from Ref 3 using following equation  $r=0.762+0.049q$ , where r is ratio between bond lengths as it show in the table and q is a charge of TTF species.

| Molecule TTF | Atom1 | Atom2 | Length, Å | ratio, $r=(L(C^1=C^4)/L(C^4-S^4))$ | charge, q |
|--------------|-------|-------|-----------|------------------------------------|-----------|
| A            | S4    | C4    | 1.723     | 0,796                              | 0,700     |
|              | C1    | C4    | 1.372     |                                    |           |
| B            | S4    | C4    | 1.722     | 0,809                              | 0,958     |
|              | C1    | C4    | 1.393     |                                    |           |
| C            | S4    | C4    | 1.712     | 0,801                              | 0,804     |
|              | C1    | C4    | 1.372     |                                    |           |
| D            | S4    | C4    | 1.722     | 0,809                              | 0,958     |
|              | C1    | C4    | 1.393     |                                    |           |
| E            | S4    | C4    | 1.732     | 0,798                              | 0,733     |
|              | C1    | C4    | 1.382     |                                    |           |
| F            | S4    | C4    | 1.722     | 0,797                              | 0,721     |
|              | C1    | C4    | 1.373     |                                    |           |
| G            | S4    | C4    | 1.722     | 0,803                              | 0,840     |
|              | C1    | C4    | 1.383     |                                    |           |
| H            | S4    | C4    | 1.722     | 0,809                              | 0,958     |
|              | C1    | C4    | 1.393     |                                    |           |
| I            | S4    | C4    | 1.712     | 0,807                              | 0,923     |
|              | C1    | C4    | 1.382     |                                    |           |
| J            | S4    | C4    | 1.712     | 0,813                              | 1,043     |
|              | C1    | C4    | 1.392     |                                    |           |
| K            | C1    | C4    | 1.414     | 0,825                              | 1,295     |
|              | S1    | C4    | 1.713     |                                    |           |
| L            | S4    | C4    | 1.722     | 0,810                              | 0,970     |
|              | C1    | C4    | 1.394     |                                    |           |

## References

1. U. Buontempo et al., J. Chem. Phys. 107 (1997), 5720.
2. Atkins et al *Inorganic Chemistry* 5th ed.(2010) Oxford University Press. p.431.
3. T.C.Umland et al., J. Phys. Chem. 92 (1986), 6456.
